# Supplementary material for: Syntaxin-6, a Reliable Biomarker for Predicting the Prognosis of Patients with Cancer and the Effectiveness of Immunotherapy
Source: MDPI journal article supplement (doi:10.3390/cancers15010027), 2022-12-21
Supplement: s1 [file s1]

## Supplementary File S1

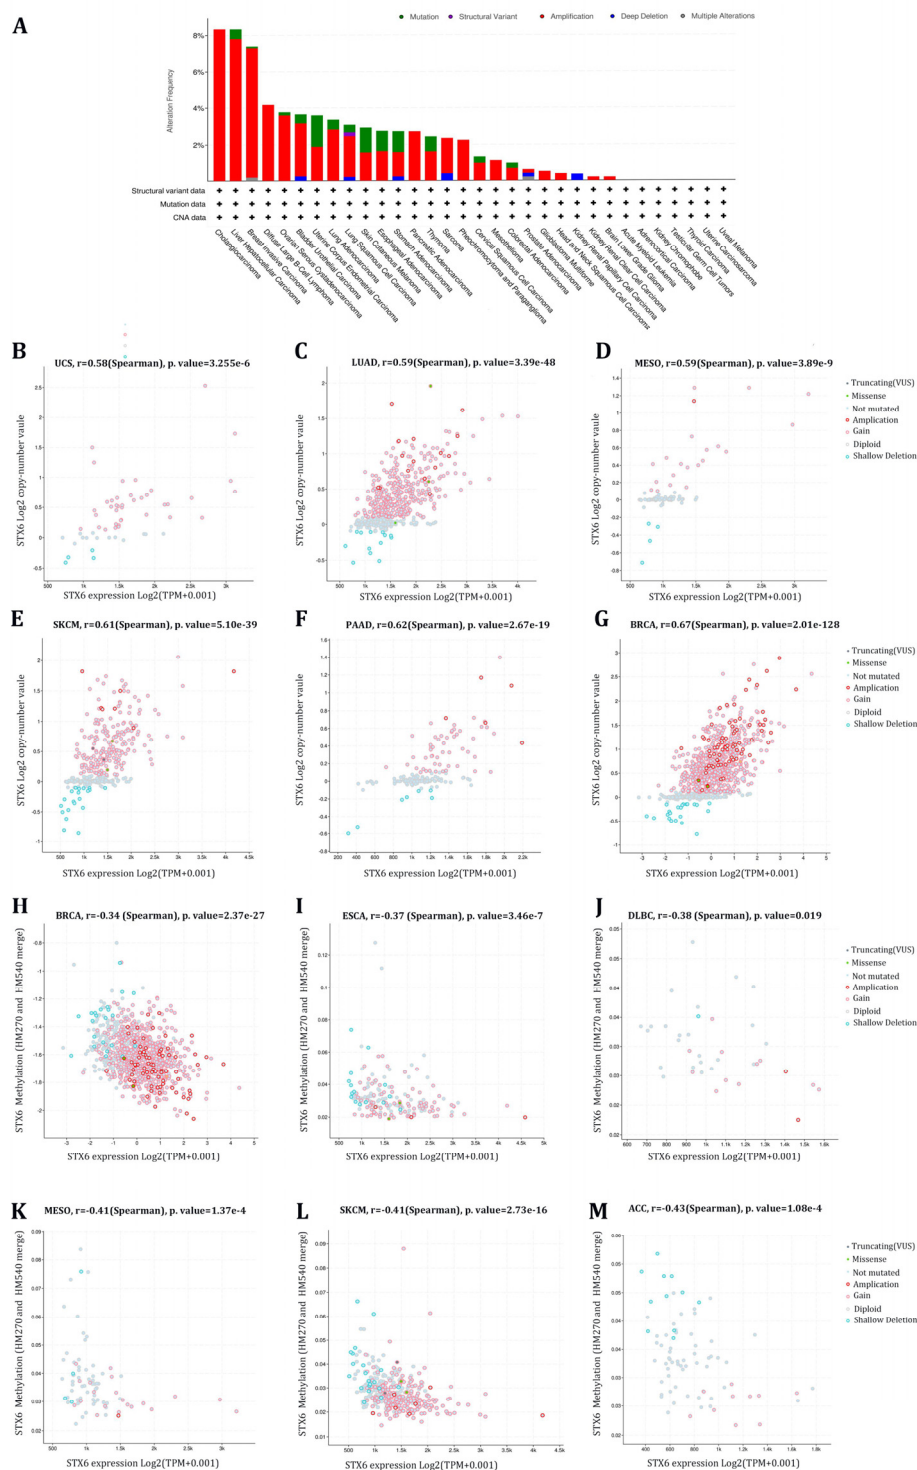

**Figure S1.** STX6 has a high mutation rate in tumor genome, especially in cholangiocarcinoma, LIHC or breast invasive cancer, and amplification is the main mutation (**A**). The expression level of STX6 was positive correlations with copy number variation (CNV): UCS, LUAD, MESO, SKCM, PAAD, and BRCA (**B-G**), whereas inversely linked with the amount of promoter methylation in BRCA, ESCA, DLBC, MESO, SKCM, and ACC (**H-M**).

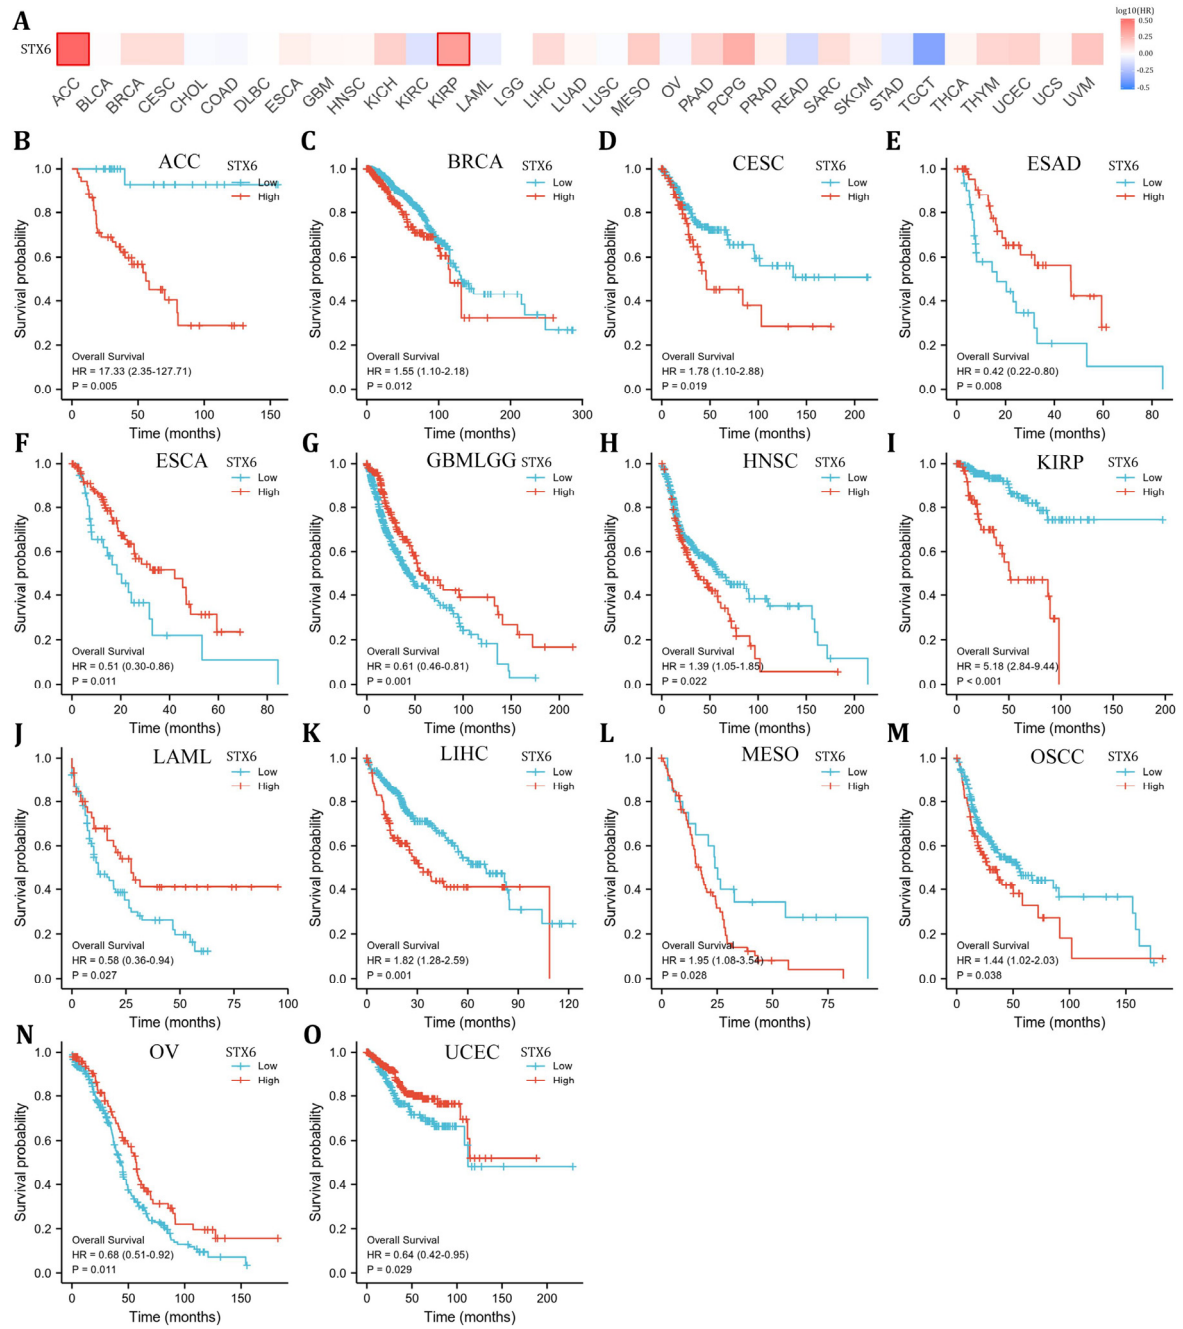

**Figure S2:** STX6 was a poor predictor of patient survival in ACC, BRCA, CESC, HNSC, KIRP, LIHC, MESO, and OSCC among these malignancies (**B, C, D, H, I, K, L, M**). STX6 enhanced the results of individuals with ESAD, ESCA, GBMLGG, LAML, OV, and UCEC (**E, F, G, J, N, O**), meanwile (TCGA databse).

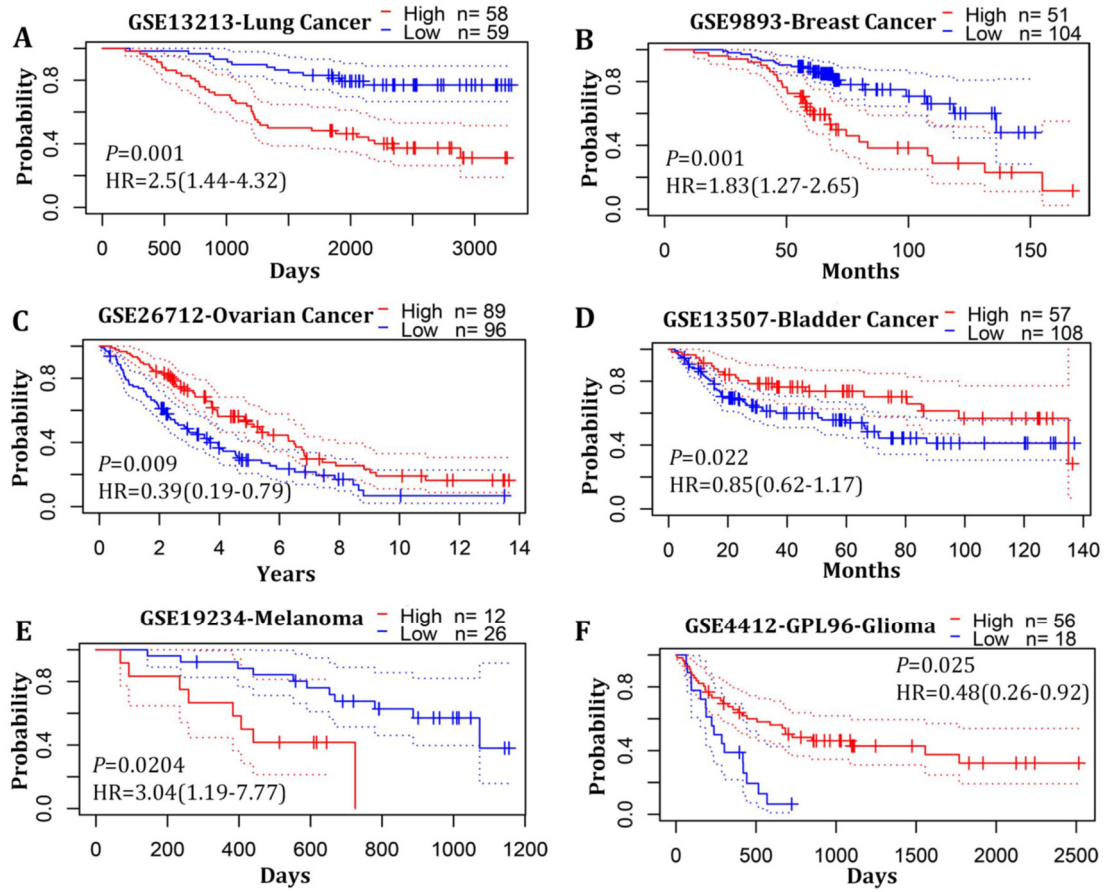

**Figure S3:** STX6 was a poor predictor of patient survival in lung cancer (A), Breast Cancer (B) and Melanoma (E), while was a favor predictor for patients with Ovarian Cancer (C), Bladder Cancer (D) and Glioma (F) (GEO database).

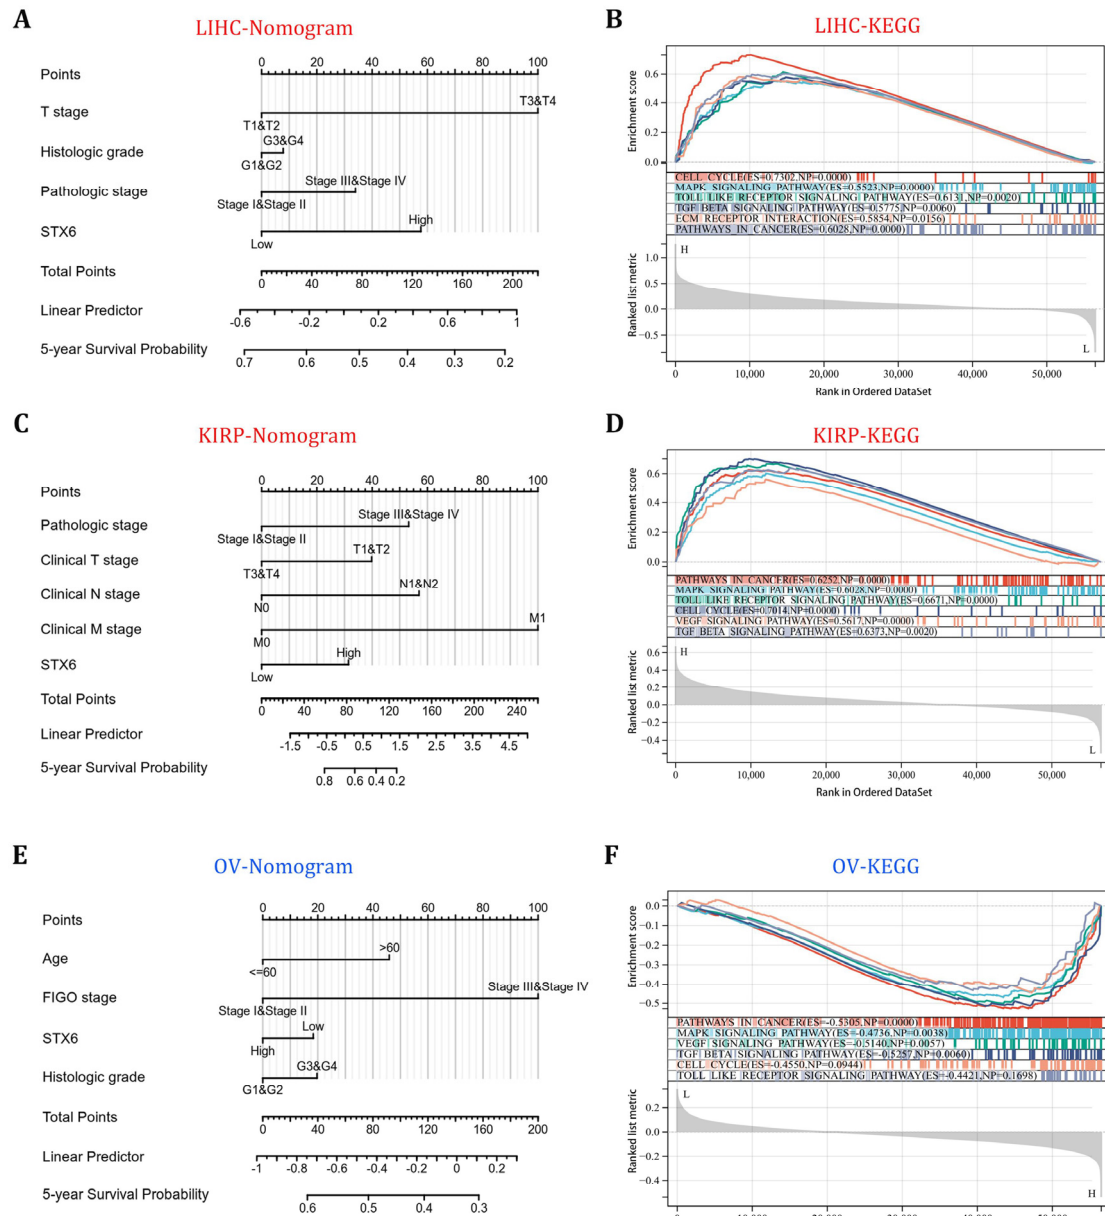

**Figure S4:** STX6 can be used as a powerful predictor of 5-year survival rate in patients with LIHC (A), KIRP (C) or OV (E). KEGG pathway enrichment analysis indicated that STX6 was significantly associated with pathways in cancer, cell cycle, EMT, VEGF signal pathway, TGF BEBTA pathway and Toll-like receptor pathways in LIHC (B), KIRP (D) and OV (F).

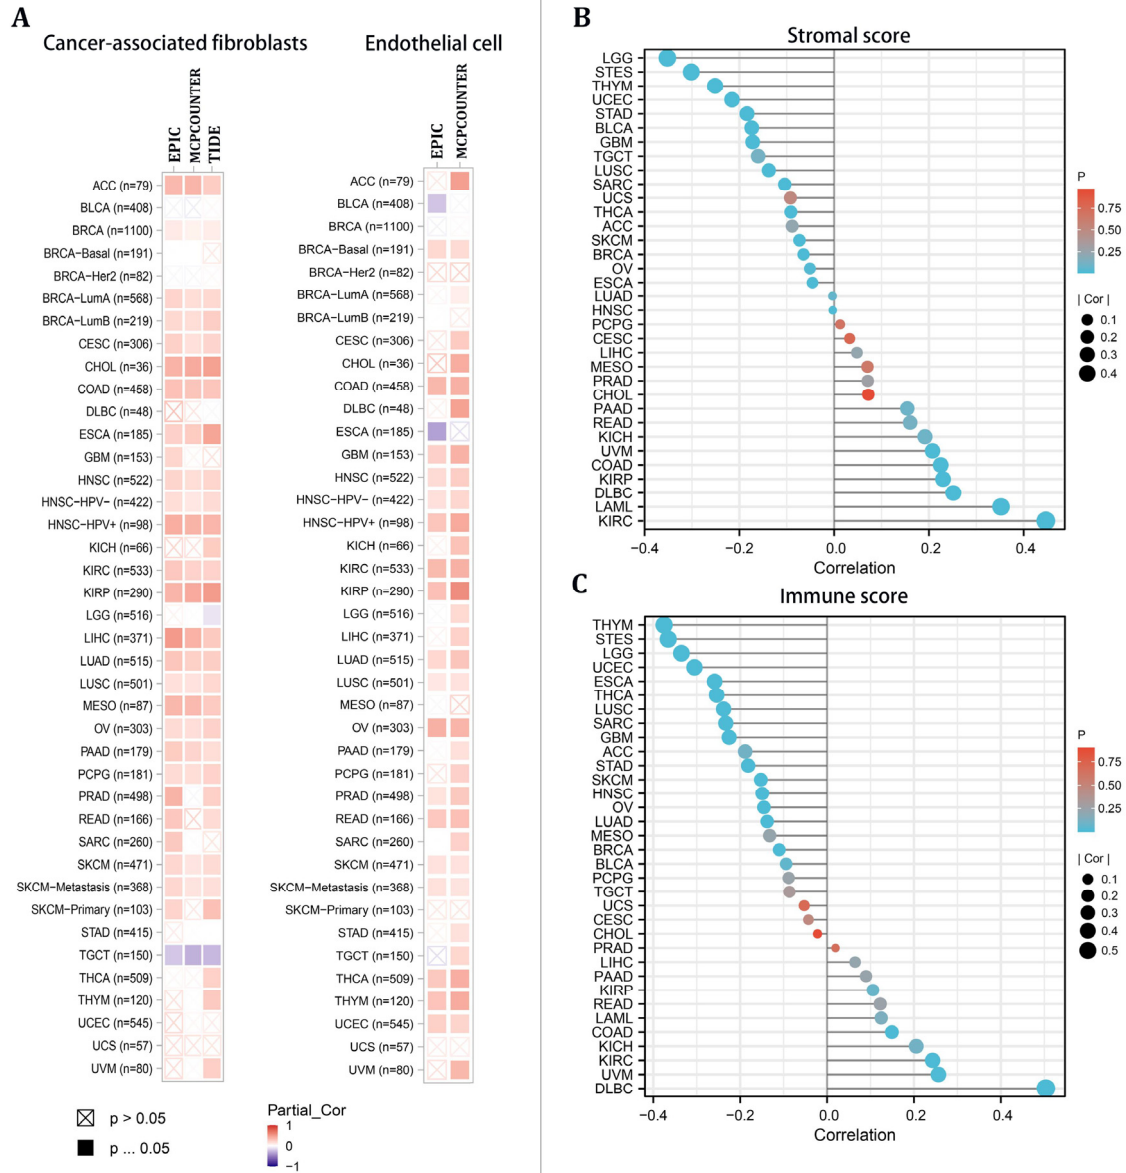

**Figure S5:** STX6 was positive correlation with Cancer-associated fibroblasts infiltration and Endothelial cell proliferation (A). The expression level of STX6 was a robust predictor for tumor stromal score or immune score, especially in LGG, STES, THYM, UCEC, DLBC or KIRC (B).
